# Supplementary material for: Experimental and theoretical studies of the ternary thiophosphate PbPS3 featuring ethane-like [P2S6]4− units
Source: Royal Society of Chemistry journal article supplement (doi:10.1039/d0dt03420g), 2020-01-01
Supplement: d0dt03420g1.pdf [file d0dt03420g1.pdf]

## Electronic Supplementary Information (ESI)

### Experimental and Theoretical Studies of the Ternary Thiophosphate

#### PbPS<sub>3</sub> Featuring Ethane-Like [P<sub>2</sub>S<sub>6</sub>]<sup>4-</sup> Unit

Peng Wang, Maierhaba Abudoureheman,\* Zhaohui Chen\*

*School of Chemical Engineering and Technology, Key Laboratory of Coal Clean Conversion & Chemical Engineering Process of Xinjiang Uyghur Autonomous Region, Xinjiang University, 666 Shengli Road, Urumqi 830046, China*

*To whom correspondence should be addressed:*

*E-mails: marhaba714@163.com (Maierhaba Abudoureheman);*

*chenzhaohui@sina.cn (Zhaohui Chen).*

**Theoretical Calculations of  $M^I_{2n}/M^{II}_n P_n S_{3n}$  ( $M^I = K, Rb, n = 2$ ;  $M^{II} = Ca, Sr, Ba, Sn, n = 2$ ).**

Utilizing the plane wave pseudopotential method implemented in the CASTEP package, the first-principles calculations of  $M^I_{2n}/M^{II}_n P_n S_{3n}$  ( $M^I = K, Rb, n = 2$ ;  $M^{II} = Ca, Sr, Ba, Sn, n = 2$ ) based on the density functional theory (DFT) were carried out.<sup>1</sup> For the  $K_4P_2S_6$ ,<sup>3</sup>  $Rb_4P_2S_6$ ,<sup>3</sup>  $Ca_2P_2S_6$ ,<sup>4</sup>  $Sr_2P_2S_6$ ,<sup>4</sup>  $Ba_2P_2S_6$ ,<sup>5</sup> and  $Sn_2P_2S_6$ ,<sup>6</sup> the energy cutoff was chosen to be 910.0, 720.0, 880.0, 720.0, 720.0, and 720.0 eV, respectively, and the Monkhorst-Pack k-point grid was set by  $4 \times 3 \times 3$ ,  $3 \times 3 \times 4$ ,  $4 \times 3 \times 3$ ,  $4 \times 3 \times 3$ ,  $3 \times 4 \times 4$ , and  $4 \times 3 \times 2$  in the Brillouin Zone (BZ),<sup>7, 8</sup> respectively. In order to model the effective interactions between valence electrons and the atom cores, the valence electrons were set as  $3s^2 3p^3$  configuration for P,  $3s^2 3p^4$  for S,  $3s^2 3p^6 4s^1$  for K,  $4s^2 4p^6 5s^1$  for Rb,  $3s^2 3p^6 4s^2$  for Ca,  $4s^2 4p^6 5s^2$  for Sr,  $5s^2 5p^6 6s^2$  for Ba, and  $5s^2 5p^2$  for Sn, respectively.

**Table S1.** Atomic coordinates, isotropic displacement parameters, bond valence sums (BVS) and global instability index (GII) for PbPS<sub>3</sub>.

| <b>Atoms</b>    | <b>Wyckoff position</b> | <b>Occupancy</b> | <b><i>x</i></b> | <b><i>y</i></b> | <b><i>z</i></b> | <b><i>U</i><sub>eq</sub></b> | <b><i>BVS</i></b> |
|-----------------|-------------------------|------------------|-----------------|-----------------|-----------------|------------------------------|-------------------|
| Pb(1)           | 4e                      | 1                | 9607(1)         | 6172(1)         | 7494(1)         | 22(1)                        | 1.812             |
| P(1)            | 4e                      | 1                | 4387(2)         | 6096(2)         | 5654(1)         | 9(1)                         | 3.888             |
| S(1)            | 4e                      | 1                | 6551(2)         | 8017(2)         | 5561(2)         | 14(1)                        | 1.973             |
| S(2)            | 4e                      | 1                | 1810(2)         | 6939(2)         | 4644(2)         | 13(1)                        | 1.877             |
| S(3)            | 4e                      | 1                | 3990(2)         | 5052(2)         | 7610(2)         | 15(1)                        | 1.850             |
| <b>GII (vu)</b> |                         |                  |                 |                 |                 |                              | <b>0.131</b>      |

The concept of  $GII^{9, 10}$  can be derived from the bond valence concepts, which represents the tension of lattice parameters and is always used to estimate the rationality of the structure. To a reliable structure, its  $GII$  value should be limited at 0.05-0.2 in general. As for the title compound, PbPS<sub>3</sub>, the calculated  $GII$  value is 0.131 vu, indicating that the crystal structure was reasonable.

**Table S2.** Selected bond distances (Å) and angles (deg) for PbPS<sub>3</sub>.

| Atoms                                        | Bond Distances (Å) or<br>Angles (deg) | Atoms                                        | Bond Distances (Å) or<br>Angles (deg) |
|----------------------------------------------|---------------------------------------|----------------------------------------------|---------------------------------------|
| Pb(1)-S(1)                                   | 3.0100(17)                            | S(3) <sup>#1</sup> -Pb(1)-S(2) <sup>#1</sup> | 67.24(4)                              |
| Pb(1)-S(3) <sup>#1</sup>                     | 3.011(2)                              | S(3) <sup>#2</sup> -Pb(1)-S(2) <sup>#1</sup> | 69.52(4)                              |
| Pb(1)-S(3) <sup>#2</sup>                     | 3.040(2)                              | S(1) <sup>#3</sup> -Pb(1)-S(2) <sup>#1</sup> | 140.62(4)                             |
| Pb(1)-S(1) <sup>#3</sup>                     | 3.0893(19)                            | S(2) <sup>#4</sup> -Pb(1)-S(2) <sup>#1</sup> | 140.36(3)                             |
| Pb(1)-S(2) <sup>#4</sup>                     | 3.1129(17)                            | S(1)-Pb(1)-S(1) <sup>#4</sup>                | 134.99(3)                             |
| Pb(1)-S(2) <sup>#1</sup>                     | 3.1370(18)                            | S(3) <sup>#1</sup> -Pb(1)-S(1) <sup>#4</sup> | 69.94(4)                              |
| Pb(1)-S(1) <sup>#4</sup>                     | 3.1806(19)                            | S(3) <sup>#2</sup> -Pb(1)-S(1) <sup>#4</sup> | 74.50(4)                              |
| Pb(1)-S(2) <sup>#5</sup>                     | 3.1922(19)                            | S(1) <sup>#3</sup> -Pb(1)-S(1) <sup>#4</sup> | 73.04(5)                              |
| P(1)-S(1)                                    | 2.027(2)                              | S(2) <sup>#4</sup> -Pb(1)-S(1) <sup>#4</sup> | 63.71(5)                              |
| P(1)-S(3)                                    | 2.020(2)                              | S(2) <sup>#1</sup> -Pb(1)-S(1) <sup>#4</sup> | 123.68(5)                             |
| P(1)-S(2)                                    | 2.025(2)                              | S(1)-Pb(1)-S(2) <sup>#5</sup>                | 76.85(5)                              |
| P(1)-P(1) <sup>#5</sup>                      | 2.213(3)                              | S(3) <sup>#1</sup> -Pb(1)-S(2) <sup>#5</sup> | 94.92(4)                              |
| S(1)-Pb(1)-S(3) <sup>#1</sup>                | 140.89(4)                             | S(3) <sup>#2</sup> -Pb(1)-S(2) <sup>#5</sup> | 139.08(4)                             |
| S(1)-Pb(1)-S(3) <sup>#2</sup>                | 75.25(5)                              | S(1) <sup>#3</sup> -Pb(1)-S(2) <sup>#5</sup> | 75.30(5)                              |
| S(3) <sup>#1</sup> -Pb(1)-S(3) <sup>#2</sup> | 88.38(3)                              | S(2) <sup>#4</sup> -Pb(1)-S(2) <sup>#5</sup> | 124.66(3)                             |
| S(1)-Pb(1)-S(1) <sup>#3</sup>                | 122.17(4)                             | S(2) <sup>#1</sup> -Pb(1)-S(2) <sup>#5</sup> | 74.32(5)                              |
| S(3) <sup>#1</sup> -Pb(1)-S(1) <sup>#3</sup> | 91.21(4)                              | S(1) <sup>#4</sup> -Pb(1)-S(2) <sup>#5</sup> | 144.33(4)                             |
| S(3) <sup>#2</sup> -Pb(1)-S(1) <sup>#3</sup> | 145.52(4)                             | S(3)-P(1)-S(2)                               | 114.70(9)                             |
| S(1)-Pb(1)-S(2) <sup>#4</sup>                | 77.60(5)                              | S(3)-P(1)-S(1)                               | 114.93(9)                             |
| S(3) <sup>#1</sup> -Pb(1)-S(2) <sup>#4</sup> | 133.56(4)                             | S(2)-P(1)-S(1)                               | 110.12(10)                            |
| S(3) <sup>#2</sup> -Pb(1)-S(2) <sup>#4</sup> | 77.12(5)                              | S(3)-P(1)-P(1) <sup>#5</sup>                 | 106.29(11)                            |
| S(1) <sup>#3</sup> -Pb(1)-S(2) <sup>#4</sup> | 78.39(5)                              | S(2)-P(1)-P(1) <sup>#5</sup>                 | 106.51(10)                            |
| S(1)-Pb(1)-S(2) <sup>#1</sup>                | 73.75(5)                              | S(1)-P(1)-P(1) <sup>#5</sup>                 | 103.18(10)                            |

Symmetry transformations used to generate equivalent atoms:

|                        |                        |            |
|------------------------|------------------------|------------|
| #1 -x+3/2,y-1/2,-z+3/2 | #2 -x+3/2,y+1/2,-z+3/2 | #3 x+1,y,z |
| #4 x+1/2,-y+3/2,z+1/2  | #5 -x+1,-y+1,-z+1      | #6 x-1,y,z |
| #7 x-1/2,-y+3/2,z-1/2  |                        |            |

**Table S3.** Mulliken atomic populations of PbPS<sub>3</sub>.

| <b>Charge Q (in   e  )</b> |      |      |             |
|----------------------------|------|------|-------------|
| Atom                       | Pb   | P    | S           |
| population                 | 0.80 | 0.55 | 0.44 - 0.45 |

**Table S4.** Crystallographic information of  $M^{I}_{2n}/M^{II}_n P_n S_{3n}$  ( $M^I = K, Rb, n = 2$ ;  $M^{II} = Ca, Sr, Ba, Sn, Pb, n = 1, 2$ ).

| Compound                                                   | Space Group             | Z | Cell Parameter                                                                                             | P-S Unit                                                | MS <sub>x</sub>                        | Structural Dimension | ICSD Number |
|------------------------------------------------------------|-------------------------|---|------------------------------------------------------------------------------------------------------------|---------------------------------------------------------|----------------------------------------|----------------------|-------------|
| K <sub>4</sub> P <sub>2</sub> S <sub>6</sub> <sup>3</sup>  |                         | 4 | $a = 13.243(3) \text{ \AA}, b = 11.946(2) \text{ \AA}, c = 8.3955(17) \text{ \AA}, \beta = 91.44(3)^\circ$ |                                                         | KS <sub>6</sub> ,<br>KS <sub>7</sub>   |                      | 426905      |
| Rb <sub>4</sub> P <sub>2</sub> S <sub>6</sub> <sup>3</sup> |                         | 4 | $a = 13.538(3) \text{ \AA}, b = 12.310(3) \text{ \AA}, c = 8.7510(18) \text{ \AA}, \beta = 92.46(3)^\circ$ |                                                         | RbS <sub>7</sub> ,<br>RbS <sub>8</sub> |                      | 426908      |
| Ca <sub>2</sub> P <sub>2</sub> S <sub>6</sub> <sup>4</sup> |                         | 2 | $a = 6.532(2) \text{ \AA}, b = 7.281(2) \text{ \AA}, c = 11.101(4) \text{ \AA}, \beta = 124.00(4)^\circ$   |                                                         | CaS <sub>8</sub>                       |                      | 405192      |
| Sr <sub>2</sub> P <sub>2</sub> S <sub>6</sub> <sup>4</sup> | <i>P2<sub>1</sub>/c</i> | 2 | $a = 6.643(2) \text{ \AA}, b = 7.557(3) \text{ \AA}, c = 11.397(3) \text{ \AA}, \beta = 124.07(2)^\circ$   | Isolated [P <sub>2</sub> S <sub>6</sub> ] <sup>4-</sup> | SrS <sub>8</sub>                       | 3D                   | 405191      |
| Ba <sub>2</sub> P <sub>2</sub> S <sub>6</sub> <sup>5</sup> |                         | 2 | $a = 9.966(1) \text{ \AA}, b = 7.580(2) \text{ \AA}, c = 6.737(2) \text{ \AA}, \beta = 91.17(3)^\circ$     |                                                         | BaS <sub>9</sub>                       |                      | 412764      |
| Sn <sub>2</sub> P <sub>2</sub> S <sub>6</sub> <sup>6</sup> |                         | 2 | $a = 6.518(1) \text{ \AA}, b = 7.463(1) \text{ \AA}, c = 11.475(2) \text{ \AA}, \beta = 125.72(1)^\circ$   |                                                         | SnS <sub>8</sub>                       |                      | 72835       |
| PbPS <sub>3</sub> <sup>[a]</sup>                           |                         | 4 | $a = 6.603(3) \text{ \AA}, b = 7.456(4) \text{ \AA}, c = 9.401(5) \text{ \AA}, \beta = 91.618(6)^\circ$    |                                                         | PbS <sub>8</sub>                       |                      | -           |

[a]

This

work.

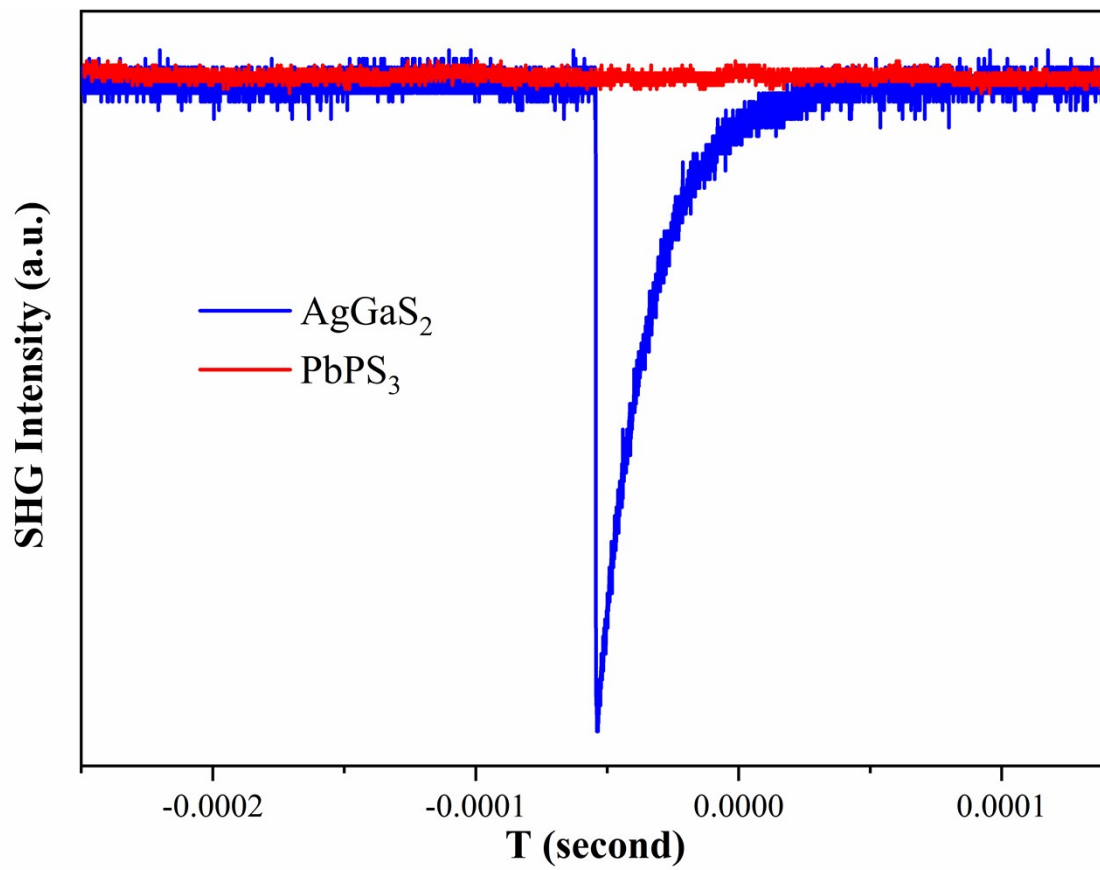

**Figure S1.** The results of second harmonic generation (SHG) measurement of  $\text{PbPS}_3$  and  $\text{AgGaS}_2$ .

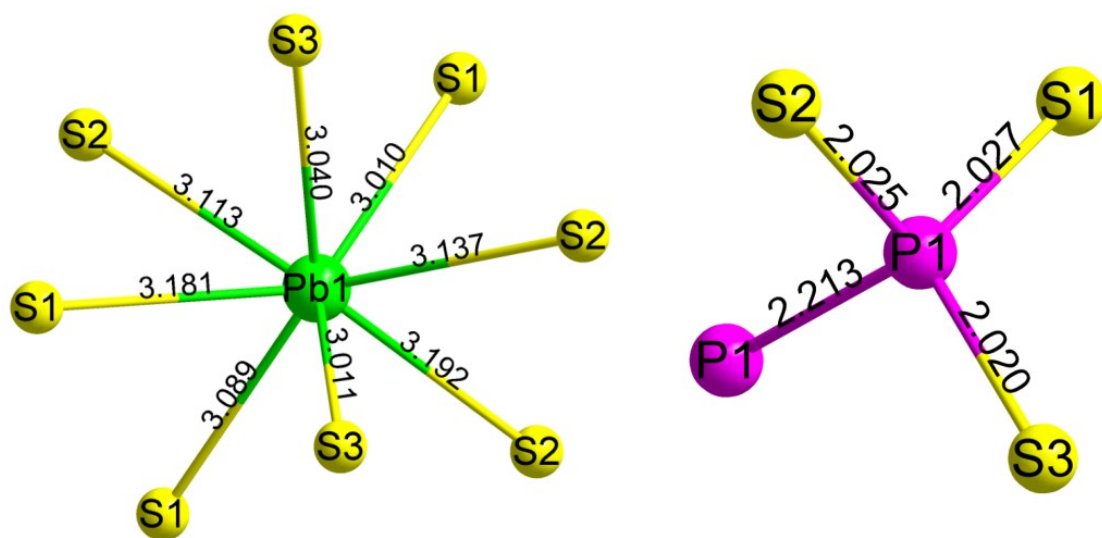

**Figure S2.** Coordination environments and bond lengths in  $\text{PbPS}_3$ .



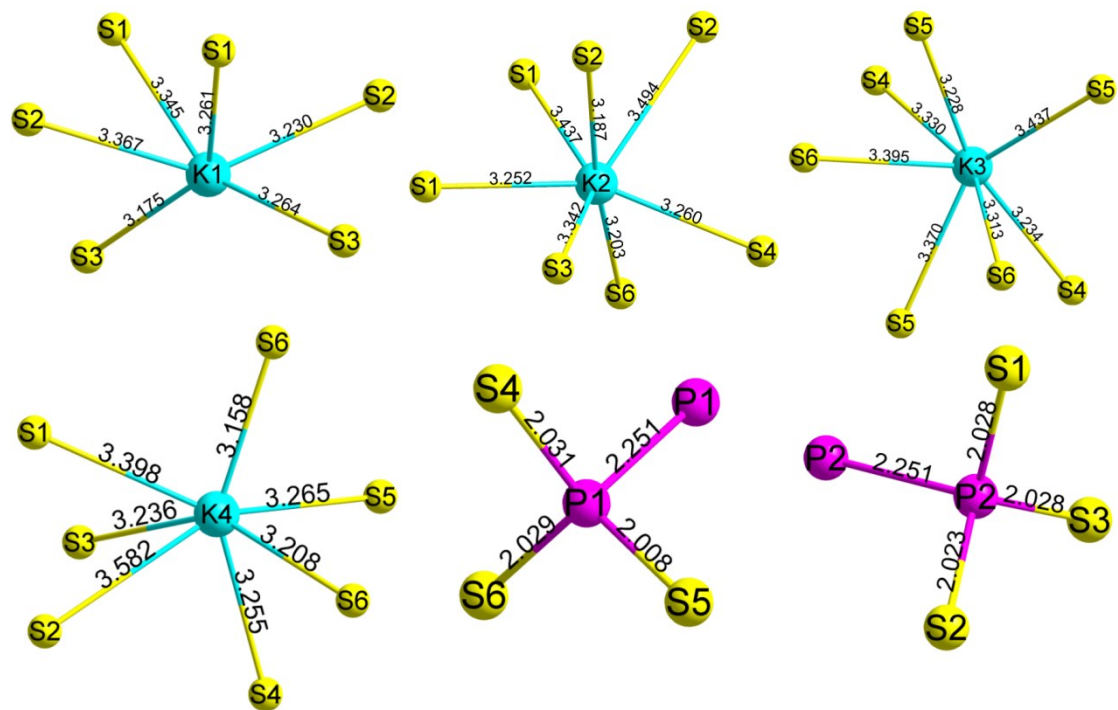

Figure S3. Coordination environments and bond lengths in K<sub>4</sub>P<sub>2</sub>S<sub>6</sub>.

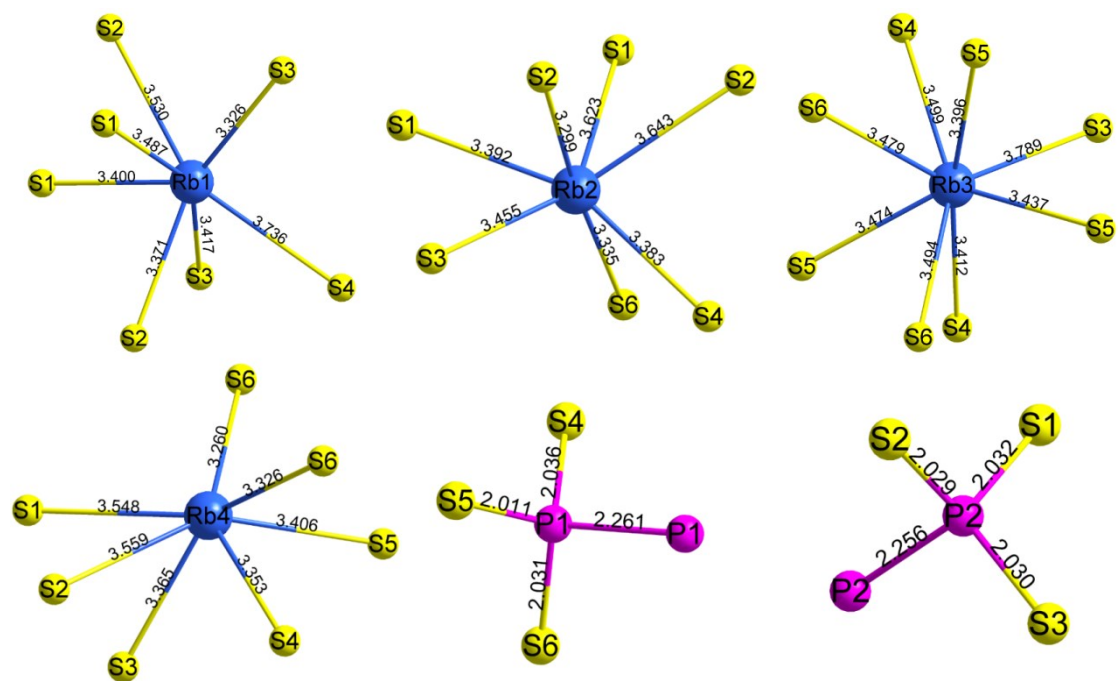

**Figure S4.** Coordination environments and bond lengths in Rb<sub>4</sub>P<sub>2</sub>S<sub>6</sub>.

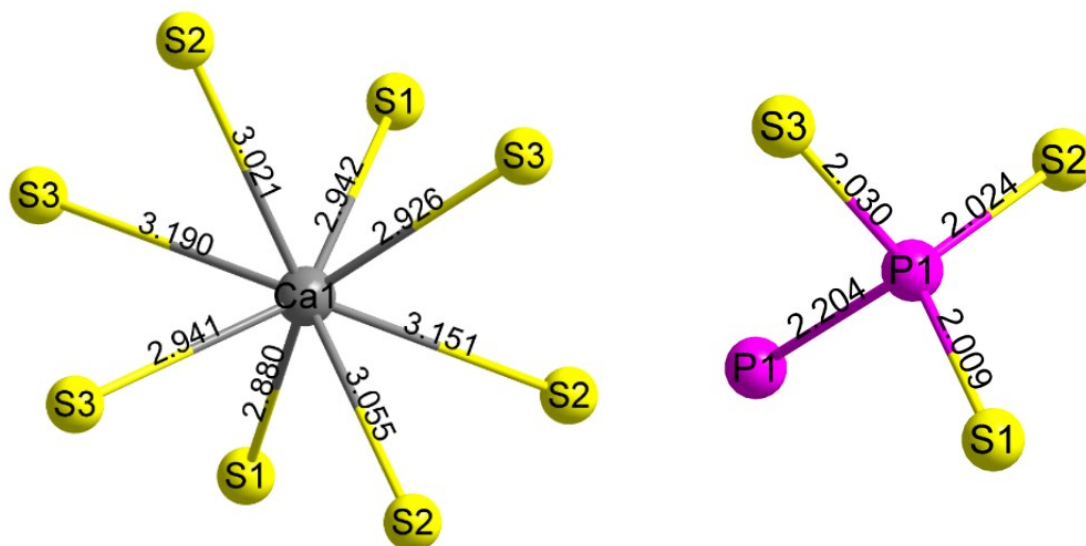

**Figure S5.** Coordination environments and bond lengths in  $\text{Ca}_2\text{P}_2\text{S}_6$ .

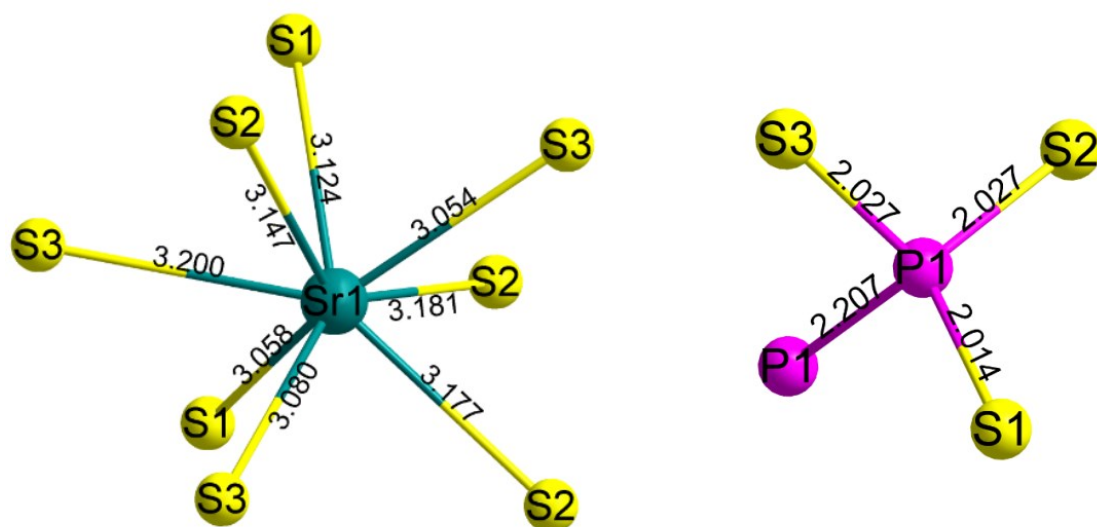

Figure S6. Coordination environments and bond lengths in  $\text{Sr}_2\text{P}_2\text{S}_6$ .

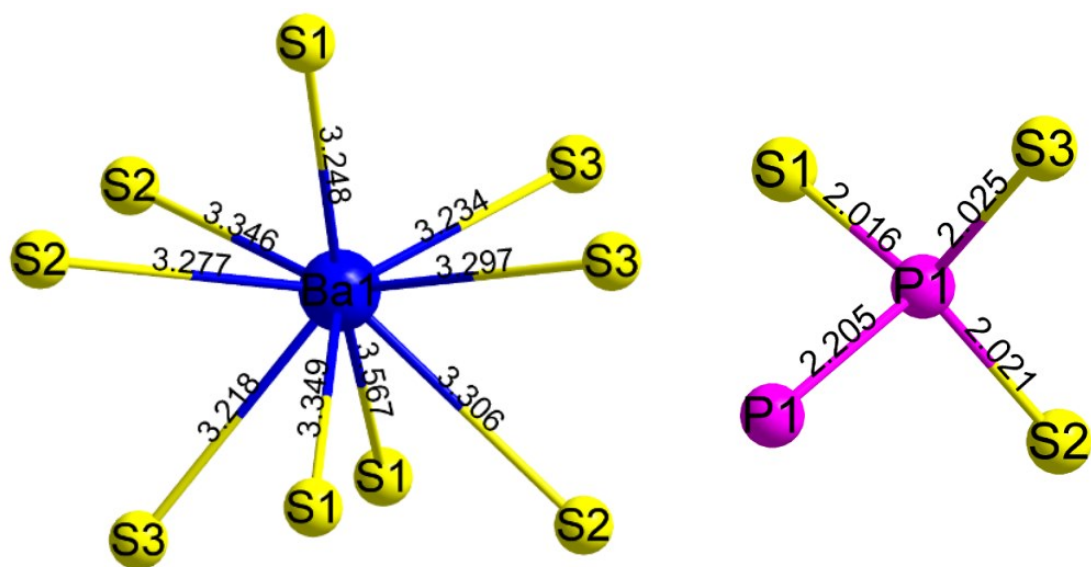

Figure S7. Coordination environments and bond lengths in Ba<sub>2</sub>P<sub>2</sub>S<sub>6</sub>.

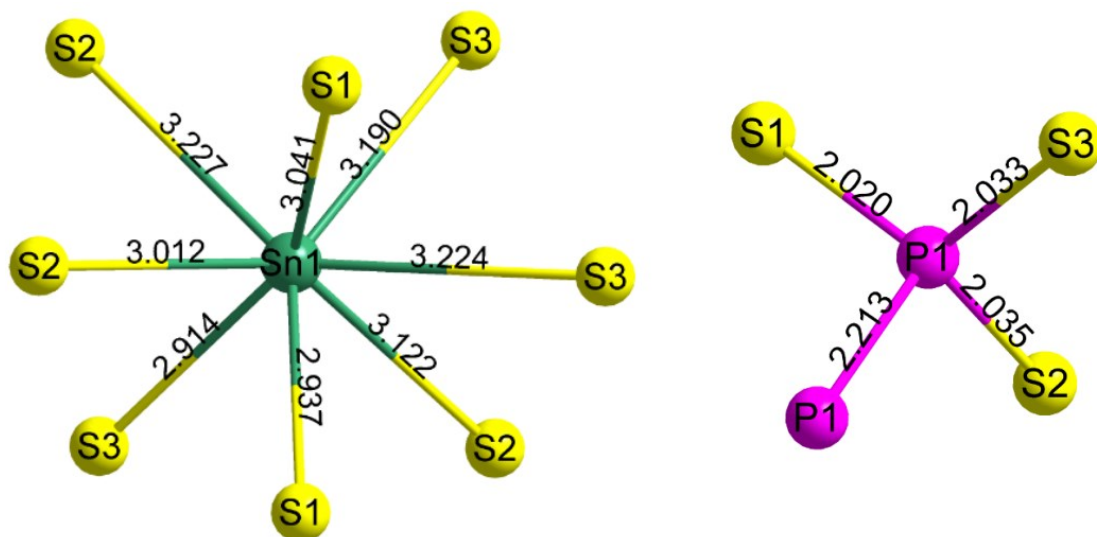

Figure S8. Coordination environments and bond lengths in  $\text{Sn}_2\text{P}_2\text{S}_6$ .

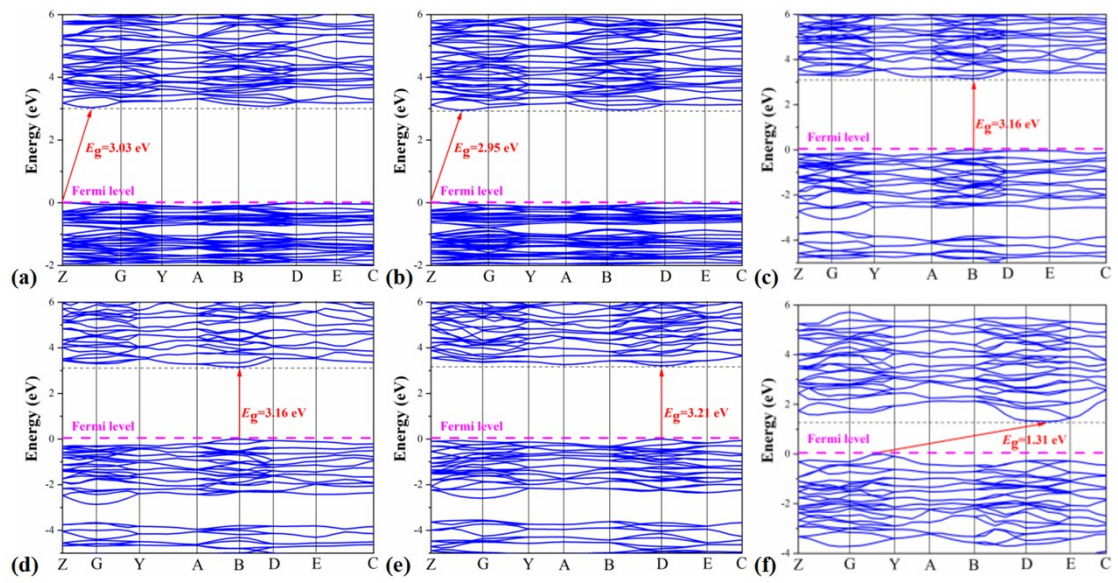

**Figure S9.** The calculated band gap of  $\text{K}_4\text{P}_2\text{S}_6$  (a),  $\text{Rb}_4\text{P}_2\text{S}_6$  (b),  $\text{Ca}_2\text{P}_2\text{S}_6$  (c),  $\text{Sr}_2\text{P}_2\text{S}_6$  (d),  $\text{Ba}_2\text{P}_2\text{S}_6$ , and  $\text{Sn}_2\text{P}_2\text{S}_6$  (f).

## References

1. S. J. Clark, M. D. Segall, C. J. Pickard, P. J. Hasnip, M. I. J. Probert, K. Refson and M. C. Payne, *Z. Kristallogr. - Cryst. Mater.*, 2005, **220**, 567-570.
2. J. P. Perdew, K. Burke and M. Ernzerhof, *Phys. Rev. Lett.*, 1996, **77**, 3865-3868.
3. A. Kuhn, R. Eger, J. Nuss and B. V. Lotsch, *Z. Anorg. Allg. Chem.*, 2014, **640**, 689-692.
4. C. Hadenfeldt and D. Hoedel, *Z. Anorg. Allg. Chem.*, 1996, **622**, 1495-1500.
5. S. Jörgens, A. Mewis, R. D. Hoffmann, R. Pöttgen and B. D. Mosel, *Z. Anorg. Allg. Chem.*, 2003, **629**, 429-433.
6. B. Scott, M. Pressprich, R. D. Willet and D. A. Cleary, *J. Solid State Chem.*, 1992, **96**, 294-300.
7. J. S. Lin, A. Qteish, M. C. Payne and V. V. Heine, *Phys. Rev. B: Condens. Matter Mater. Phys.*, 1993, **47**, 4174-4180.
8. A. M. Rappe, K. M. Rabe, E. Kaxiras and J. D. Joannopoulos, *Phys. Rev. B: Condens. Matter Mater. Phys.*, 1990, **41**, 1227-1230.
9. C. Preiser, J. Losel, I. D. Brown, M. Kunz and A. Skowron, *Acta Crystallogr. B*, 1999, **55**, 698-711.
10. S. Adams, *Solid State Ionics*, 2004, **168**, 281-290.
